# Supplementary material
Source: MDPI journal article supplement (https://www.mdpi.com/2072-4292/16/7/1206)
Supplement: s1 [file s1]

## Supplementary materials

In table S1 are reported all the variables used to build the model. Initially, the features used were 67, including the 4 labels. After the pre-processing, the remaining features, in total, were 32.

| Feature                          | Source   | Spatial resolution | Time period | Type             | Feature name           |
|----------------------------------|----------|--------------------|-------------|------------------|------------------------|
| Municipality                     | ISTAT    | Municipal          | 2011        | Census           | Municipality           |
| Region                           | ISTAT    | Municipal          | 2011        | Census           | cod_reg                |
| Control unit                     | ARPA     | Municipal          | 2019-2022   | Ground Pollution | Control_unit           |
| Mean Longitude                   | ISTAT    | Municipal          | 2011        | Census           | mean_longitude         |
| Standard deviation Longitude     | ISTAT    | Municipal          | 2011        | Census           | sd_longitude           |
| Mean Latitude                    | ISTAT    | Municipal          | 2011        | Census           | mean_latitude          |
| Standard deviation Latitude      | ISTAT    | Municipal          | 2011        | Census           | sd_latitude            |
| Municipality Perimeter           | ISTAT    | Municipal          | 2011        | Census           | municipality_perimeter |
| Municipality Area                | ISTAT    | Municipal          | 2011        | Census           | municipality_area      |
| Mean height                      | ISTAT    | Municipal          | 2011        | Census           | mean_height            |
| Max height                       | ISTAT    | Municipal          | 2011        | Census           | max_height             |
| Min height                       | ISTAT    | Municipal          | 2011        | Census           | min_height             |
| Standard deviation height        | ISTAT    | Municipal          | 2011        | Census           | sd_height              |
| Difference of max and min height | ISTAT    | Municipal          | 2011        | Census           | diff_height            |
| Median height                    | ISTAT    | Municipal          | 2011        | Census           | median_height          |
| Height of the center             | ISTAT    | Municipal          | 2011        | Census           | center_height          |
| Altimetric zone                  | ISTAT    | Municipal          | 2011        | Census           | altimetric_zone        |
| Coastal areas                    | ISTAT    | Municipal          | 2011        | Census           | coastal_areas          |
| Island Municipality              | ISTAT    | Municipal          | 2011        | Census           | island_municipality    |
| Coastal Municipality             | ISTAT    | Municipal          | 2011        | Census           | coastal_municipality   |
| Urbanization level               | ISTAT    | Municipal          | 2011        | Census           | urbanization_level     |
| Total population                 | ISTAT    | Municipal          | 2011        | Census           | Population             |
| Population density               | Computed | Municipal          | 2011        | Census           | population_density     |

|                                   |          |           |           |        |                    |
|-----------------------------------|----------|-----------|-----------|--------|--------------------|
| Male Population                   | ISTAT    | Municipal | 2011      | Census | male_pop           |
| Female Population                 | ISTAT    | Municipal | 2011      | Census | female_pop         |
| Foreign Population                | ISTAT    | Municipal | 2011      | Census | foreign_pop        |
| Illiterate Population             | ISTAT    | Municipal | 2011      | Census | illiterate_pop     |
| Non graduated Population          | ISTAT    | Municipal | 2011      | Census | no_grad_pop        |
| Total Roads length                | ISTAT    | Municipal | 2011      | Census | roads_tot          |
| Roads Density                     | Computed | Municipal | 2011      | Census | roads_density      |
| Homes occupied                    | ISTAT    | Municipal | 2011      | Census | homes_occ          |
| Homes empty                       | ISTAT    | Municipal | 2011      | Census | homes_emp          |
| Total Buildings                   | ISTAT    | Municipal | 2011      | Census | buildings_tot      |
| Residential Buildings             | ISTAT    | Municipal | 2011      | Census | buildings_res      |
| Commercial Buildings              | ISTAT    | Municipal | 2011      | Census | buildings_comm     |
| Building density                  | Computed | Municipal | 2011      | Census | buildings_density  |
| Number of Families                | ISTAT    | Municipal | 2011      | Census | families           |
| Total Workers                     | ISTAT    | Municipal | 2011      | Census | workers            |
| Employed workers                  | ISTAT    | Municipal | 2011      | Census | workers_emp        |
| Other type of workers             | ISTAT    | Municipal | 2011      | Census | workers_oth        |
| Volunteers                        | ISTAT    | Municipal | 2011      | Census | workers_volunteers |
| Year                              |          |           | 2019-2022 | Time   | Year               |
| Sine of the encoded month         | Computed |           | 2019-2022 | Time   | Sin.month          |
| Cosine of the encoded month       | Computed |           | 2019-2022 | Time   | Cos.month          |
| Sine of the encoded day of week   | Computed |           | 2019-2022 | Time   | Sin.day            |
| Cosine of the encoded day of week | Computed |           | 2019-2022 | Time   | Cos.day            |
| Ground density of NO2             | ARPA     | Pointwise | 2019-2022 | Label  | NO2.y              |
| Ground density of O3              | ARPA     | Pointwise | 2019-2022 | Label  | O3.y               |

|                                                            |                        |               |           |                     |                  |
|------------------------------------------------------------|------------------------|---------------|-----------|---------------------|------------------|
| Ground density of PM2.5                                    | ARPA                   | Pointwise     | 2019-2022 | Label               | PM2.5.y          |
| Ground density of PM10                                     | ARPA                   | Pointwise     | 2019-2022 | Label               | PM10.y           |
| Satellite NO2                                              | Copernicus Sentinel-5P | 1113.2 meters | 2019-2022 | Satellite pollution | NO2.satellite    |
| Satellite O3                                               | Copernicus Sentinel-5P | 1113.2 meters | 2019-2022 | Satellite pollution | O3.satellite     |
| Aerosol Absorbing Index                                    | Copernicus Sentinel-5P | 1113.2 meters | 2019-2022 | Satellite pollution | AAI              |
| Temperature                                                | ERA-5                  | 27830 meters  | 2019-2022 | Global reanalysis   | Temperature      |
| Pressure surface                                           | ERA-5                  | 27830 meters  | 2019-2022 | Global Reanalysis   | Pressure         |
| U component of wind at 10 meters (from East to West axis)  | ERA-5                  | 27830 meters  | 2019-2022 | Global Reanalysis   | wind_u_component |
| V component of wind at 10 meters (from South to Nord axis) | ERA-5                  | 27830 meters  | 2019-2022 | Global Reanalysis   | wind_v_component |
| Wind speed                                                 | Computed               | 27830 meters  | 2019-2022 | Global Reanalysis   | wind_speed       |
| Total precipitation                                        | ERA-5                  | 27830 meters  | 2019-2022 | Global Reanalysis   | Precipitation    |

Table S1. **Features table.** All the features used to build the Machine Learning model. The green features are the ones selected after the pre-processing phase.

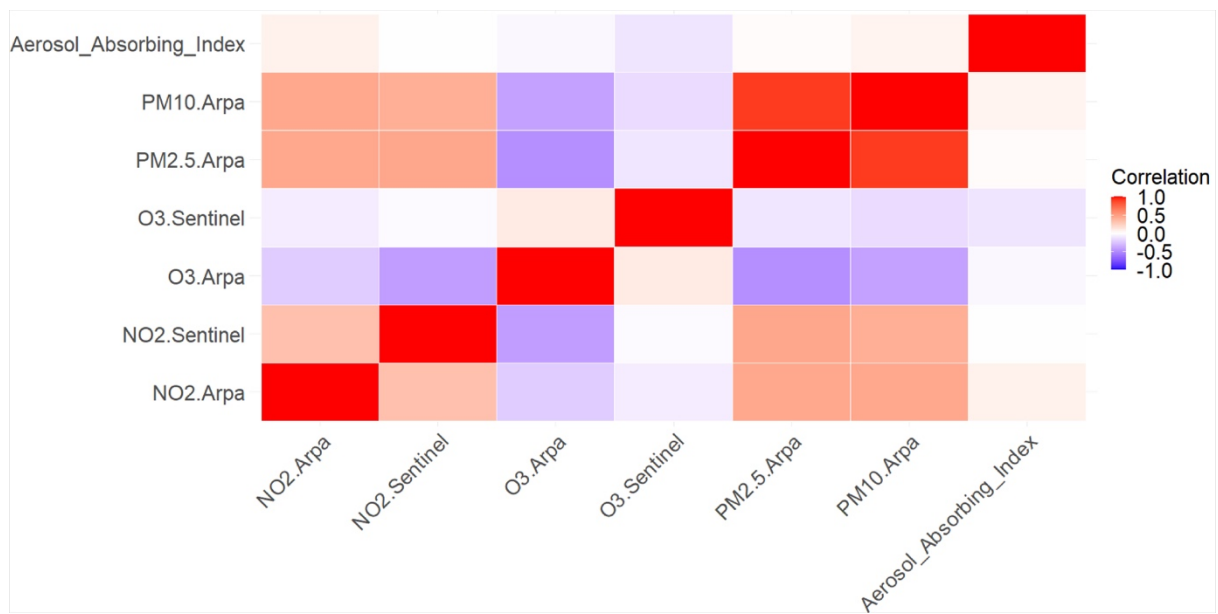

Figure S1. **Correlation matrix.** Correlation matrix of the concentration of air pollutants.
